# Supplementary material for: Electrochemical in situ construction of vanadium oxide heterostructures with boosted pseudocapacitive charge storage
Source: Royal Society of Chemistry journal article supplement (doi:10.1039/c9ta12097a), 2019-12-11
Supplement: c9ta12097a1.pdf [file c9ta12097a1.pdf]

**Supporting information**

**Electrochemical in Situ Construction of Vanadium Oxide Heterostructures with Boosted Pseudocapacitive Charge Storage**

Ran Dong, Yu Song\*, Duo Yang, Hua-Yu Shi, Zengming Qin, Mingyue Zhang, Di Guo, Xiaoqi Sun, Xiao-Xia Liu\*

Department of Chemistry, Northeastern University, Shenyang 110819, China

E-mail: [songyu@mail.neu.edu.cn](mailto:songyu@mail.neu.edu.cn); [xxliu@mail.neu.edu.cn](mailto:xxliu@mail.neu.edu.cn)

## 1. Calculations

### 1.1 Specific capacitance calculation based on galvanostatic charge/discharge curves

The gravimetric and areal capacitance of single electrodes is calculated based on Equation S1 and S2, respectively:

$$C_g = \frac{I \times t}{\Delta U \times m} \quad (\text{Equation S1})$$

$$C_a = \frac{I \times t}{\Delta U \times S} \quad (\text{Equation S2})$$

Where  $C_g$  and  $C_a$  are the gravimetric and areal specific capacitance (F/g or mF/cm<sup>2</sup>),  $I$  is the current density (mA cm<sup>-2</sup>),  $t$  is the discharge time (s),  $\Delta U$  is the potential window (V),  $s$  is the geometric electrode working area (1 cm<sup>2</sup>), and  $m$  represents the mass loading of the oxide on the electrode (mg cm<sup>-2</sup>).

The gravimetric and areal capacitance of the device is calculated based on Equation S3 and S4, respectively:

$$C_G = \frac{I \times t}{U \times m} \quad (\text{Equation S3})$$

$$C_A = \frac{I \times t}{U \times S} \quad (\text{Equation S4})$$

Where  $C_G$  and  $C_A$  are the gravimetric and areal specific capacitance (F/g or mF/cm<sup>2</sup>),  $U$  is the potential window of the device (V),  $s$  is the geometric device working area (1 cm<sup>2</sup>), and  $m$  represents the mass loading of the oxide on the electrode (mg cm<sup>-2</sup>).

The volumetric capacitance of the device from the constant current charge-discharge profile is calculated from Equation S5:

$$C_v = \frac{It}{VU} \quad (\text{Equation S5})$$

Where  $C_v$  is the volumetric capacitance of the device (F/cm<sup>3</sup>),  $V$  is the volume of the device (cm<sup>3</sup>).

### ***1.2 Energy density and power density of the device***

The gravimetric energy density ( $E$ , Wh/kg) and power density ( $P$ , W/kg) are calculated using the following two equations:

$$E_g = \frac{1000}{2 \times 3600} C_G U^2 \quad (\text{Equation S6})$$

$$P_g = \frac{3600 \times E_g}{t} \quad (\text{Equation S7})$$

Where  $C_G$  is the specific capacitance (F/g),  $U$  is the operating voltage (V) and  $t$  is the discharge time (s) measured in constant current charge/discharge experiments.

The areal energy density ( $E$ , mWh/cm<sup>2</sup>) and power density ( $P$ , mW/cm<sup>2</sup>) are calculated using the following two equations:

$$E_a = \frac{1000}{2 \times 3600} C_A U^2 \quad (\text{Equation S8})$$

$$P_a = \frac{3600 \times E_a}{t} \quad (\text{Equation S9})$$

Where  $C_A$  is the specific capacitance (F/cm<sup>2</sup>),  $U$  is the operating voltage (V) and  $t$  is the discharge time (s) measured in constant current charge/discharge experiments.

The volumetric energy density ( $E$ , mWh/cm<sup>3</sup>) and power density ( $P$ , mW/cm<sup>3</sup>) are calculated using the following two equations:

$$E_v = \frac{1000}{2 \times 3600} C_v U^2 \quad (\text{Equation S10})$$

$$P_v = \frac{3600 \times E_v}{t} \quad (\text{Equation S11})$$

Where  $C_v$  is the specific capacitance ( $\text{F}/\text{cm}^3$ ),  $U$  is the operating voltage (V) and  $t$  is the discharge time (s) measured in constant current charge/discharge experiments.

### 1.3 Charge balance for the device

To maximize the performance of a pseudocapacitor, the amount of charge ( $Q$ ) stored in the anode and the cathode should be balanced, *i.e.*  $Q_+ = Q_-$ . The charge stored by each electrode depends on corresponding areal capacitance ( $C_a$ ), their potential windows ( $\Delta U$ ) and the geometric working area of the electrode ( $S$ ), as shown in the following equations:

$$Q_+ = C_{a,+} \times \Delta U_+ \times S_+ \quad (\text{Equation S12})$$

$$Q_- = C_{a,-} \times \Delta U_- \times S_- \quad (\text{Equation S13})$$

In order to get  $Q_+ = Q_-$ , the ratio of areal capacitance between the anode to the cathode should follow the following equation:

$$\frac{C_{a,-}}{C_{a,+}} = \frac{S_+ \times \Delta U_+}{S_- \times \Delta U_-} \quad (\text{Equation S14})$$

In this work, we chose  $\text{V}_5\text{O}_{12}/\text{VO}_2$  and  $\text{MnO}_2$  as the anode and cathode materials, respectively. Their working areas and potential windows were the same ( $S_+ = S_-$ ,  $U_+ = U_-$ ). According to Equation S14, the ratio of the areal capacitance of  $\text{V}_5\text{O}_{12}/\text{VO}_2$  to the  $\text{MnO}_2$  electrode is  $\sim 1$ , which is closed to the areal capacitance of  $\text{V}_5\text{O}_{12}/\text{VO}_2$  ( $5.03 \text{ F cm}^{-2}$ ) to  $\text{MnO}_2$  ( $5.0 \text{ F cm}^{-2}$ ) used in this work. The total mass of the active materials on both electrodes is  $\sim 23 \text{ mg cm}^{-2}$ .

### 1.4 Computational method

All the calculations are performed in the framework of the density functional theory with the projector augmented plane-wave method, as implemented in the Vienna ab initio simulation package.[1] The generalized gradient approximation proposed by Perdew, Burke, and Ernzerhof is selected for the exchange-correlation potential.[2] The long-range van der Waals interaction is described by the DFT-D3 approach.[3] The cut-off energy for the plane wave is set to 400 eV. The energy criterion is set to  $10^{-5}$  eV in the iterative solution of the Kohn-Sham equation. A vacuum layer of 15 Å is added perpendicular to the sheet to avoid artificial interaction between periodic images. The Brillouin zone integration is performed at the Gamma point. All the structures are relaxed until the residual forces on the atoms have declined to less than 0.03 eV/Å.

[1] Kresse, G.; Joubert, D. From ultrasoft pseudopotentials to the projector augmented-wave method. *Phys. Rev. B* **1999**, 59, 1758-1777.

[2] Perdew, J. P.; Burke, K.; Ernzerhof, M. Generalized gradient approximation made simple. *Phys. Rev. Lett.* **1996**, 77, 3865-3868.

[3] Grimme S, Antony J, Ehrlich S, et al. A consistent and accurate ab initio parametrization of density functional dispersion correction (DFT-D) for the 94 elements H-Pu. *J. Chem. Phys.* **2010**, 132, 154104.

## 2. Supplementary Table

**Table S1.** Electrochemical performances of the state-of-the-art vanadium oxide electrodes compared with that of V<sub>5</sub>O<sub>12</sub>/VO<sub>2</sub> electrode.

| <i>Sample</i>                                             | <i>Gravimetric Capacitance (F g<sup>-1</sup>)</i> | <i>Areal Capacitance (mF cm<sup>-2</sup>)</i> | <i>Current Density/ Scan rate</i> | <i>Potential Window (V)</i> | <i>Mass Loading (mg cm<sup>-2</sup>)</i> |
|-----------------------------------------------------------|---------------------------------------------------|-----------------------------------------------|-----------------------------------|-----------------------------|------------------------------------------|
| Ti-VO <sub>x</sub> -CNT <sup>[1]</sup>                    | 310                                               | 341                                           | 2 mV s <sup>-1</sup>              | -1~0.8 vs.A                 | 1.1                                      |
| VO <sub>x</sub> /graphene <sup>[2]</sup>                  | 358                                               | 716                                           | 0.5 mA cm <sup>-2</sup>           | -0.2~0.8 vs.SCE             | 2.0                                      |
| VO <sub>x</sub> <sup>[3]</sup>                            | 637                                               | 356.8                                         | 0.5 mA cm <sup>-2</sup>           | 0~0.8 vs.SCE                | 0.56                                     |
| S-V <sub>6</sub> O <sub>13-x</sub> <sup>[4]</sup>         | 1353                                              | 720                                           | 1.0 mA cm <sup>-2</sup>           | -1~0 vs.SCE                 | 0.52                                     |
| VO <sub>x</sub> -PANI <sup>[5]</sup>                      | 443                                               | 664                                           | 0.5 mA cm <sup>-2</sup>           | -0.9~0.7 vs.SCE             | 1.5                                      |
| V <sub>2</sub> O <sub>5</sub> -carbonfiber <sup>[6]</sup> | 408                                               | 856.8                                         | 2.1 mA cm <sup>-2</sup>           | -0.3~0.7 vs.SCE             | 2.1                                      |
| VO <sub>x</sub> -carbonfiber <sup>[7]</sup>               | 485                                               | 1310                                          | 1 mA cm <sup>-2</sup>             | -1.1~0.9 vs.SCE             | 2.7                                      |
| V <sub>2</sub> O <sub>5</sub> -PPy <sup>[8]</sup>         | 412                                               | 206                                           | 4.5 mA cm <sup>-2</sup>           | -1.4~0.6 vs.SCE             | ~0.5                                     |
| V <sub>2</sub> O <sub>5</sub> <sup>[9]</sup>              | 735                                               | 400                                           | 1 mV s <sup>-1</sup>              | 0~1 vs. A                   | 0.54                                     |
| V <sub>2</sub> O <sub>5</sub> -RGO <sup>[10]</sup>        | 178.5                                             | 382                                           | 0.05 A g <sup>-1</sup>            | -0.8~0.8 vs. A              | 2.2                                      |
| <b>V<sub>5</sub>O<sub>12</sub>/VO<sub>2</sub></b>         | <b>466</b>                                        | <b>5032</b>                                   | <b>1 mA cm<sup>-2</sup></b>       | <b>-1~0 vs. SCE</b>         | <b>~10.8</b>                             |

\*A : Ag/AgCl

- [1] P. H. Jampani, O. Velikokhatnyi, K. Kadakia, D. H. Hong, S. S. Damle, J. A. Poston, A. Manivannan, P. N. Kumta, *J. Mater. Chem. A* **2015**, 3, 8413-8432.
- [2] L. Deng, Y. Gao, Z. Ma, G. Fan, *J. Colloid Interface Sci.* **2017**, 505, 556-565.
- [3] M. Yu, Y. Zeng, Y. Han, X. Cheng, W. Zhao, C. Liang, Y. Tong, H. Tang, X. Lu, *Adv. Funct. Mater.* **2015**, 25, 3534-3540.
- [4] T. Zhai, X. Lu, Y. Ling, M. Yu, G. Wang, T. Liu, C. Liang, Y. Tong, Y. Li, *Adv. Mater.* **2014**, 26, 5869-5875.
- [5] M.-H. Bai, T.-Y. Liu, F. Luan, Y. Li, X.-X. Liu, *J. Mater. Chem. A* **2014**, 2, 10882-10888.
- [6] L. Li, S. Peng, H. B. Wu, L. Yu, S. Madhavi, X. W. D. Lou, *Adv. Energy Mater.* **2015**, 5, 1500753.
- [7] Z.-H. Huang, Y. Song, X.-X. Liu, *Chem. Eng. J.* **2019**, 358, 1529-1538.
- [8] M. H. Bai, L. J. Bian, Y. Song, X. X. Liu, *ACS Appl. Mater. Interfaces* **2014**, 6, 12656-12664.
- [9] B. Pandit, D. P. Dubal, B. R. Sankapal, *Electrochim. Acta* **2017**, 242, 382-389.
- [10] C. Y. Foo, A. Sumboja, D. J. H. Tan, J. Wang, P. S. Lee, *Adv. Energy Mater.* **2014**, 4, 1400236.

### 3. Supplementary figures

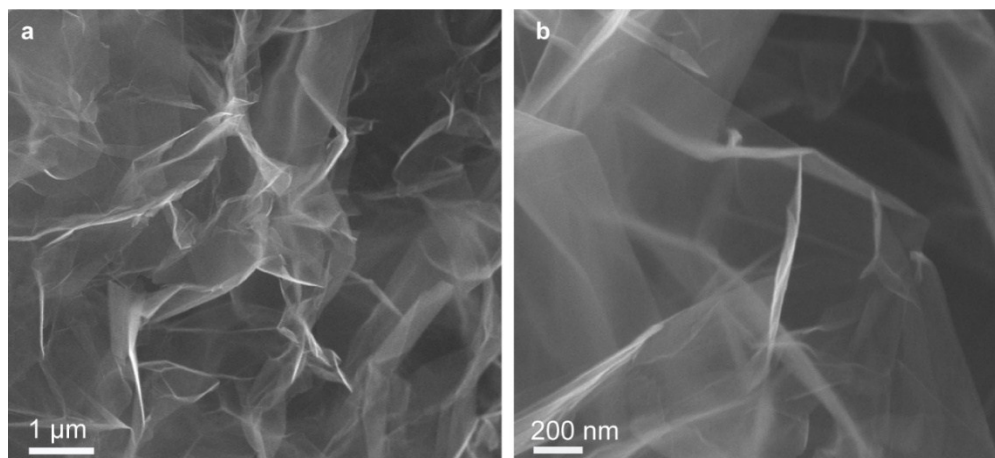

**Figure S1** SEM images for the exfoliated graphite paper electrode (EG).

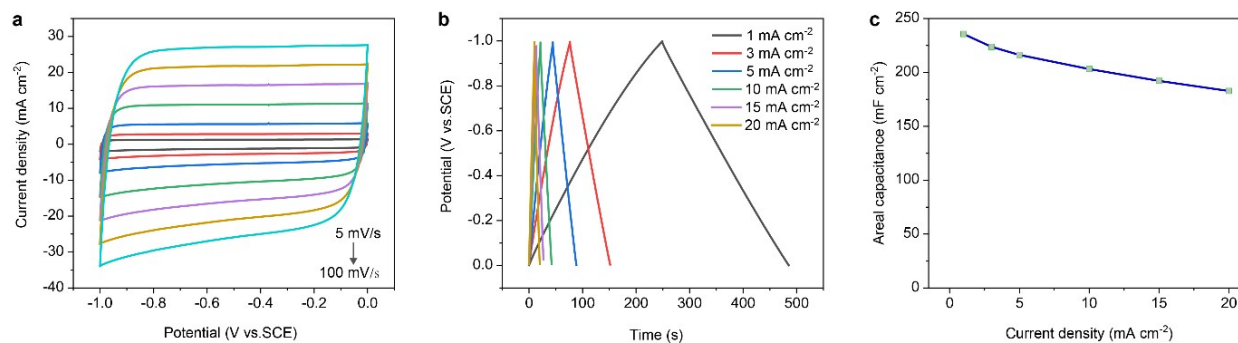

**Figure S2** Electrochemical performances of the EG substrate. (a) CV curves, (b) galvanostatic charge/discharge curves, (c) rate capability. The rectangular CV and symmetric charge/discharge curves indicate the ideal capacitive performance of the EC substrate.

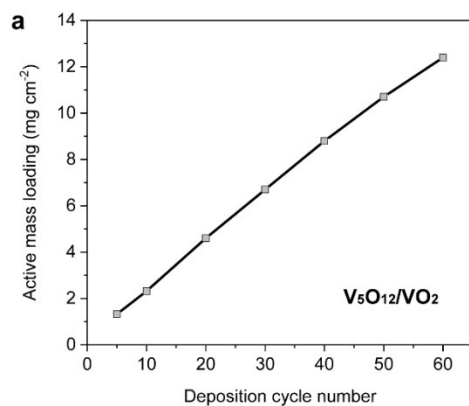

**Figure S3** Active mass loading of  $V_5O_{12}/VO_2$  as a function of deposition cycle number.

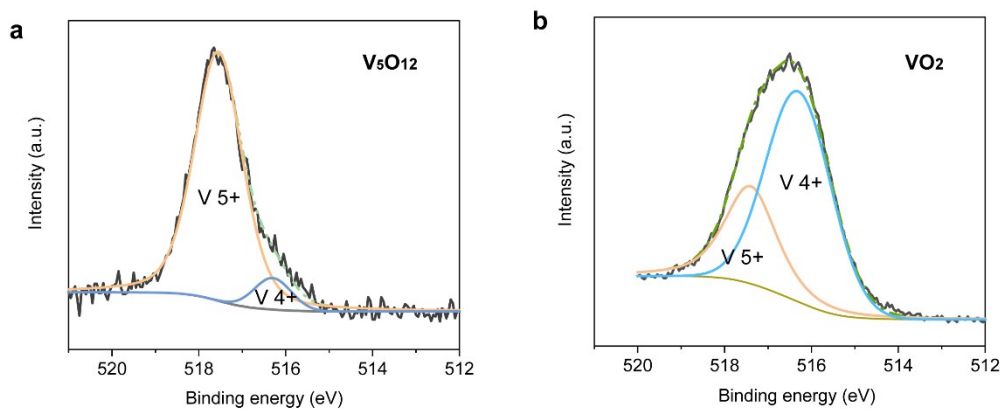

**Figure S4** XPS V 2p core-level spectra of (a)  $V_5O_{12}$  and (b)  $VO_2$  samples. The average valence states of V in pure  $V_5O_{12}$  and  $VO_2$  electrodes were calculated to be  $\sim +4.9$  and  $+4.3$ , respectively (Figure S4). The slightly higher valence states of V than the stoichiometric values in the samples could be due to the surface oxidation of V in the atmosphere.



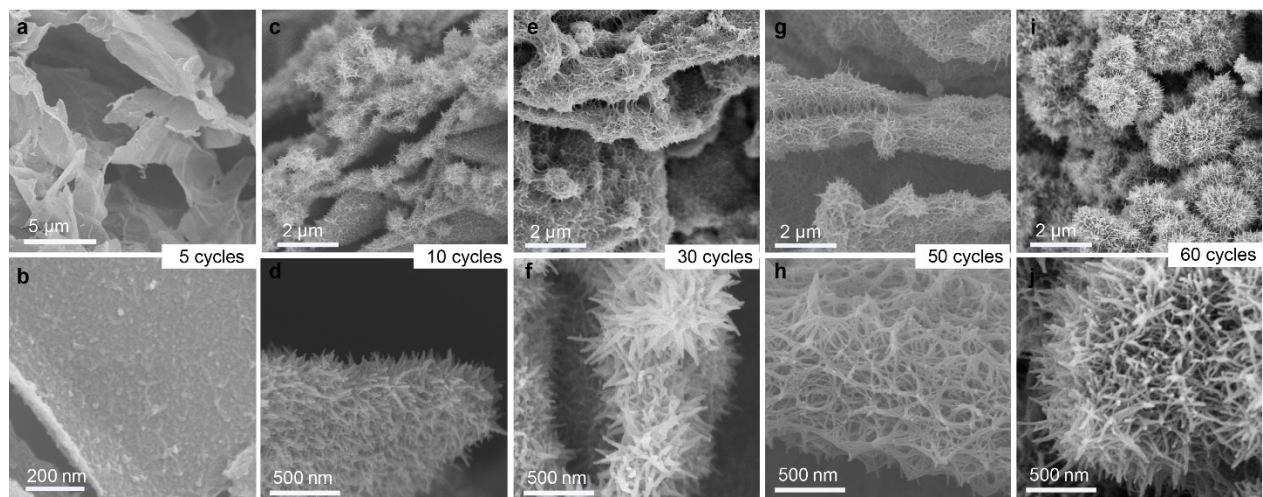

**Figure S5** SEM images of the vanadium oxides deposited on EG obtained from different CV cycles. (a, b) 5 cycles; (c, d) 10 cycles; (e, f) 30 cycles; (g, h) 50 cycles; (i, j) 60 cycles.

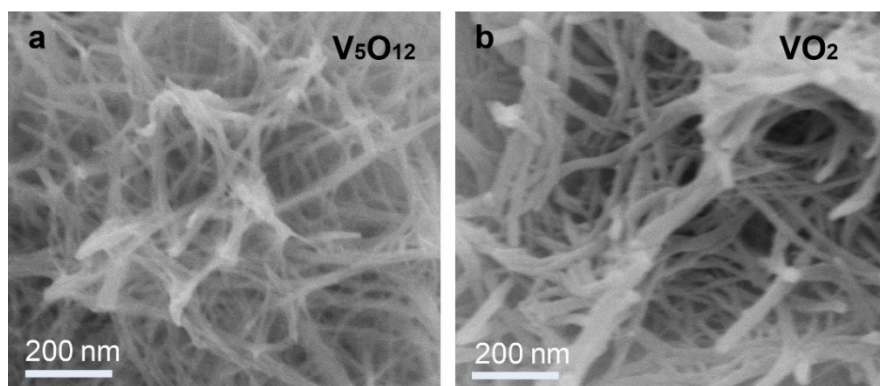

**Figure S6** SEM images of  $V_5O_{12}$  and  $VO_2$ .

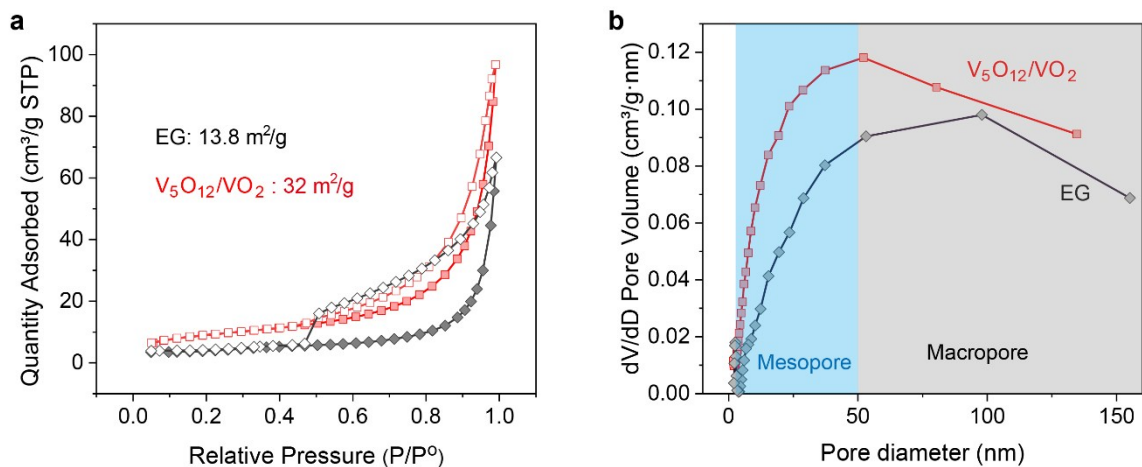

**Figure S7** (a)  $N_2$  adsorption-desorption isotherms of  $V_5O_{12}/VO_2$  and EG electrodes collected at 77 K. (b) The pore size distribution of the electrodes derived from the adsorption curves using BJH theory.

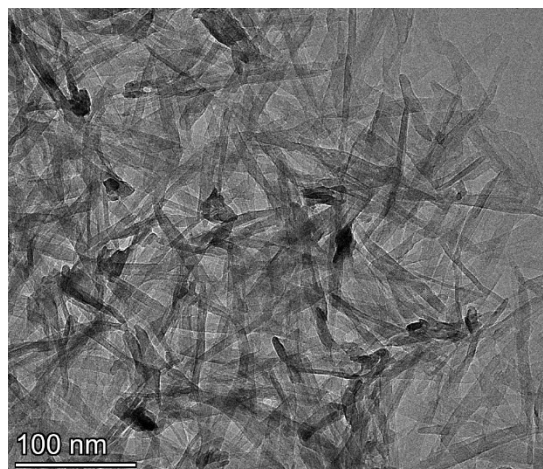

**Figure S8** TEM image of  $V_5O_{12}/VO_2$  composite

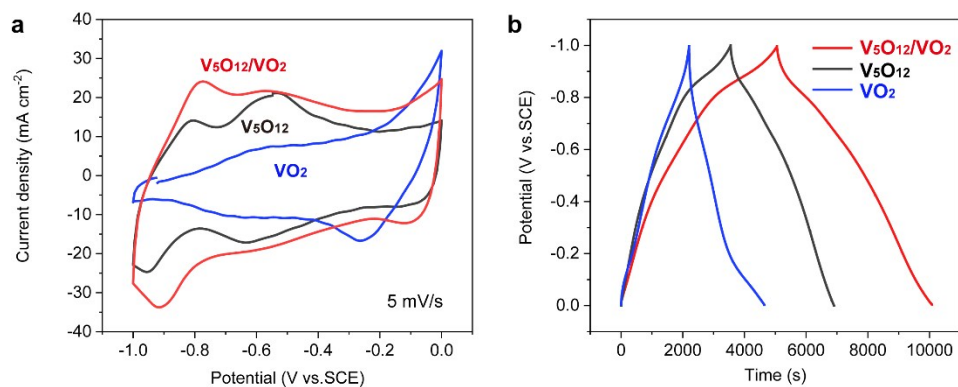

**Figure S9** (a) CV and (b) galvanostatic charge/discharge curves of  $V_5O_{12}/VO_2$ ,  $V_5O_{12}$ , and  $VO_2$  electrodes.

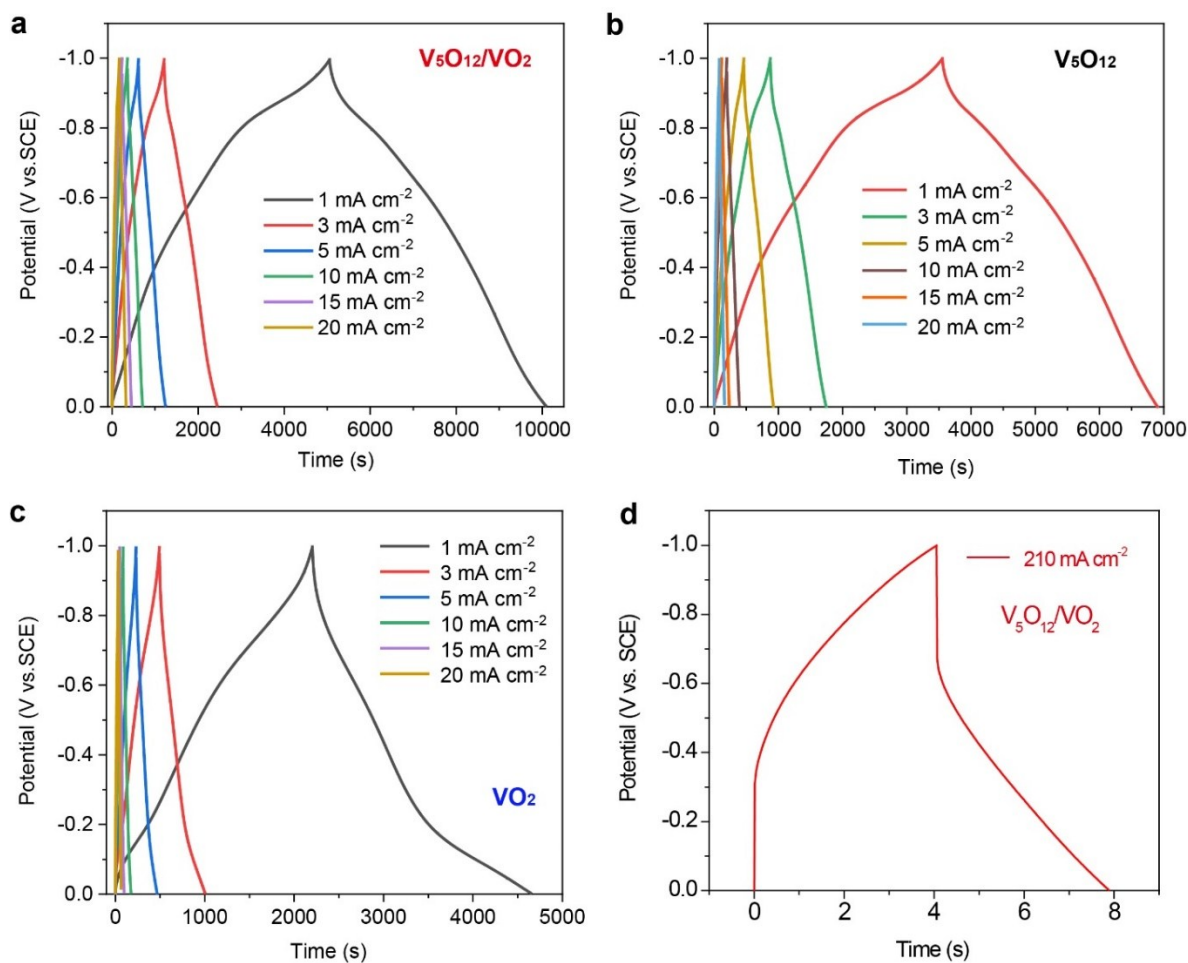

**Figure S10** Galvanostatic charge/discharge curves of (a)  $V_5O_{12}/VO_2$ , (b)  $V_5O_{12}$ , and (c)  $VO_2$  electrodes. (d) Charge/discharge curve of  $V_5O_{12}/VO_2$  at the current density of 210  $mA\ cm^{-2}$ .

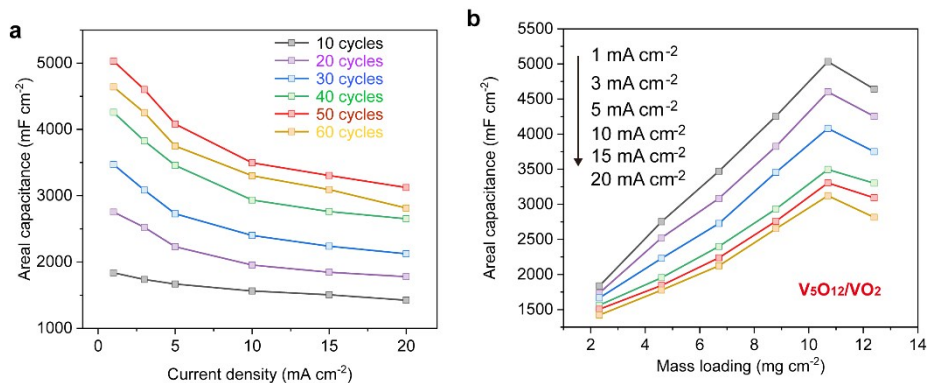

**Figure S11** (a) Areal capacitance as a function of the current density of the  $V_5O_{12}/VO_2$  materials deposited with different cycles. (b) Areal capacitance as a function of mass loading of the  $V_5O_{12}/VO_2$  materials at different current densities.

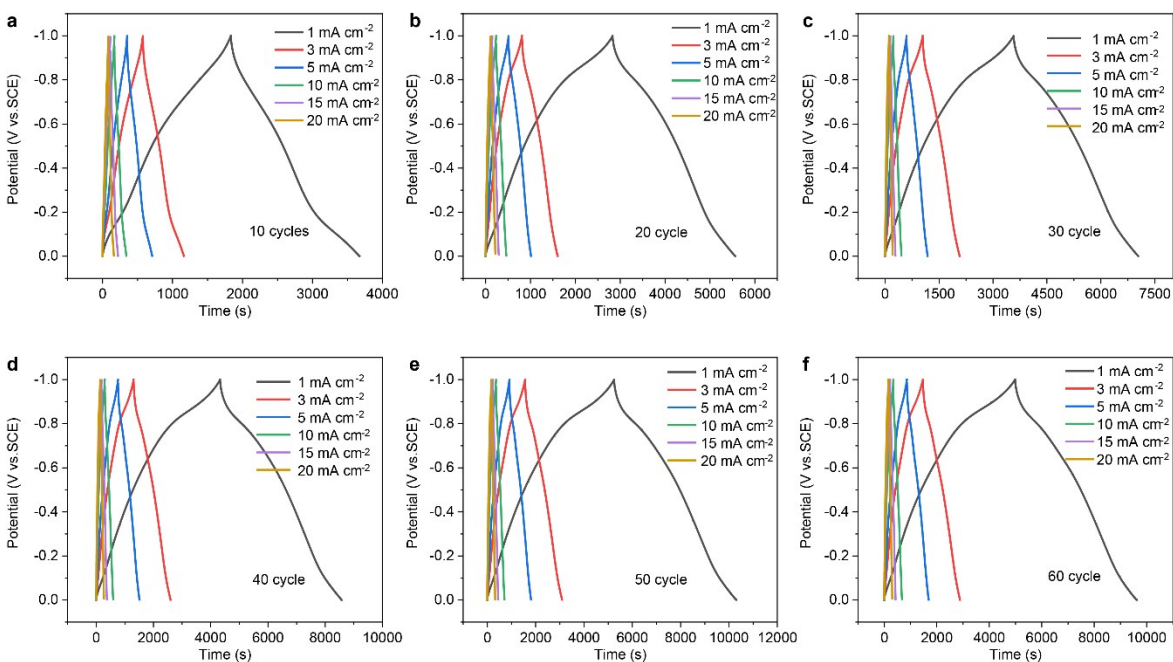

**Figure S12** Galvanostatic charge/discharge curves of the  $V_5O_{12}/VO_2$  materials deposited with different cycles.



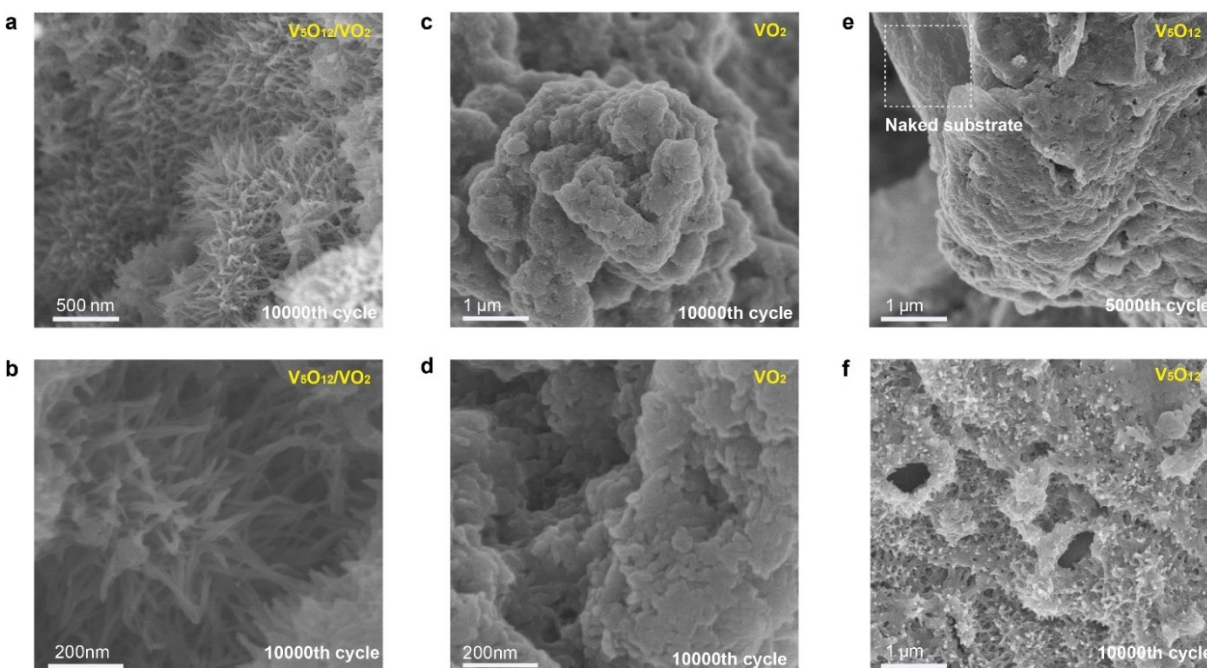

**Figure S13** (a, b) SEM images of the  $V_5O_{12}/VO_2$  electrode after 10000 charge and discharge cycles. (c, d) SEM images of the  $VO_2$  electrode after 10000 charge and discharge cycles. (e) SEM image of the  $V_5O_{12}$  electrode after 5000 charge and discharge cycles. (f) SEM images of the  $V_5O_{12}$  electrode after 10000 charge and discharge cycles.

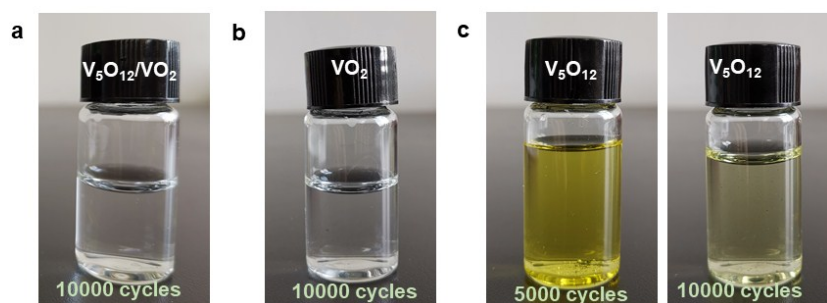

**Figure S14** (a) The digital photograph of the electrolyte after 10000 charge and discharge cycles for the  $V_5O_{12}/VO_2$  electrode. (b) The digital photograph of the electrolyte after 10000 charge and discharge cycles for the  $VO_2$  electrode. (c) The digital photographs of the electrolyte after 5000 and 10000 charge and discharge cycles for the  $V_5O_{12}$  electrode.

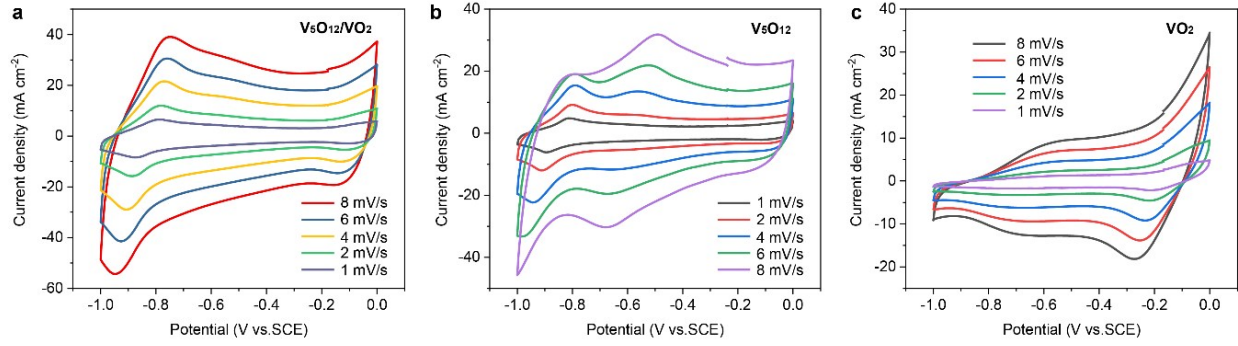

**Figure S15** CV curves of (a)  $V_5O_{12}/VO_2$ , (b)  $V_5O_{12}$  and (c)  $VO_2$  from 1 to 8  $mV s^{-1}$ .

### Dunn Method:

According to the Dunn method, the current response at a fixed potential comes from two separate mechanisms, capacitive-controlled and diffusion-controlled processes:

$$i(V) = k_1 v + k_2 v^{1/2} \quad (\text{Equation 15})$$

Where  $k_1 v$  is the current contribution from the capacitive effect, and  $k_2 v^{1/2}$  corresponds to the current contribution from the diffusion-controlled process. Dividing  $v^{1/2}$  on both sides of the equation gives:

$$i(V)/v^{1/2} = k_1 v^{1/2} + k_2 \quad (\text{Equation 16})$$

By reading the  $i(V)$  at a selected potential from CV curves collected at different scan rates followed by plotting  $i(V)/v^{1/2}$  vs.  $v^{1/2}$ , in the linear fitting line,  $k_1$  equals the slope and  $k_2$  equals the y-intercept.

Using the  $k_1$  and  $k_2$  obtained above, current contributions from the capacitive effect ( $k_1 v$ ) and diffusion-controlled process ( $k_2 v$ ) at the specific potential are obtained according to Equation (15).

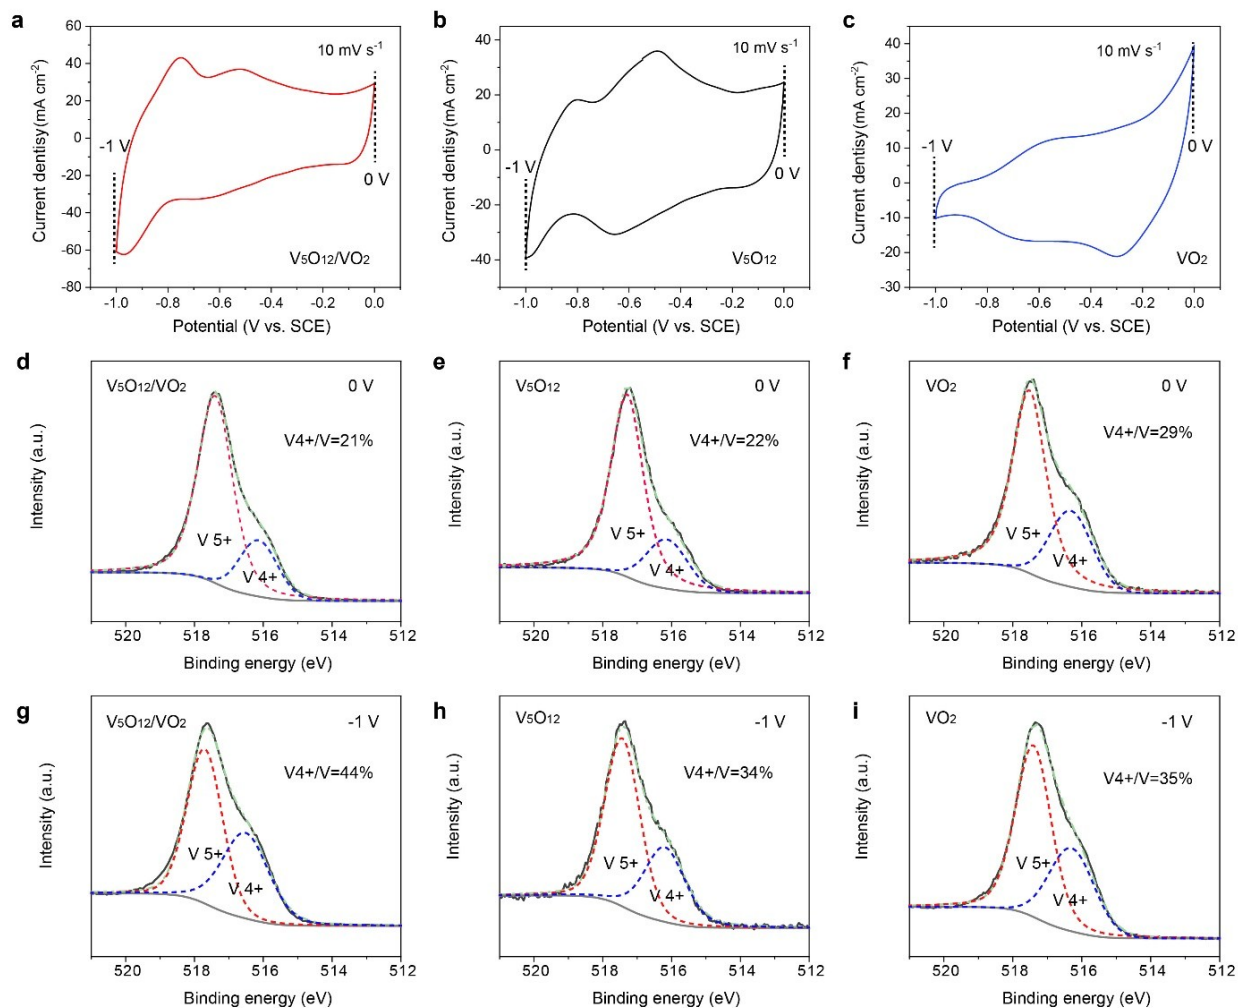

**Figure S16** CV curves of (a)  $V_5O_{12}/VO_2$ , (b)  $V_5O_{12}$  and (c)  $VO_2$  at the scan rate of  $10 \text{ mV s}^{-1}$ . XPS core-level V 2p spectra of (d)  $V_5O_{12}/VO_2$ , (e)  $V_5O_{12}$  and (f)  $VO_2$  collected at  $\sim 0 \text{ V vs. SCE}$ ; XPS core-level V 2p spectra of (g)  $V_5O_{12}/VO_2$ , (h)  $V_5O_{12}$  and (i)  $VO_2$  collected at  $\sim -1 \text{ V vs. SCE}$ . The  $V^{4+}/V$  (*i.e.*  $V^{4+} + V^{5+}$ ) ratios based on the areal of the fitting peaks were denoted in the figures.

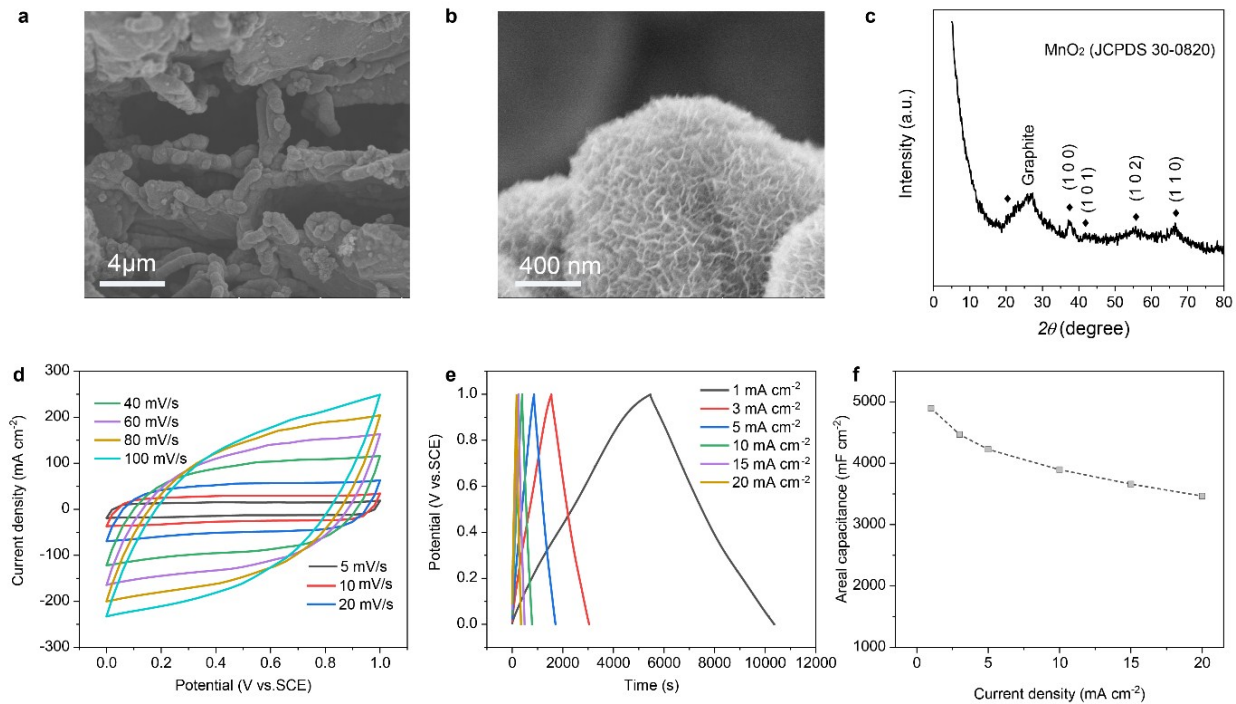

**Figure S17** (a, b) SEM images of the MnO<sub>2</sub> materials deposited on a 3D exfoliated graphite (EG) substrate. MnO<sub>2</sub> nanosheets were uniformly deposited on the exfoliated graphite/graphene sheets. (c) XRD pattern of the MnO<sub>2</sub>/EG electrode. The XRD pattern of the sample matches well with the standard pattern of hexagonal  $\epsilon$ -MnO<sub>2</sub> (JCPDS 30-0820). (d) CV curves of the MnO<sub>2</sub>/EG electrode at different scan rates. (e) Galvanostatic charge/discharge curves of the MnO<sub>2</sub>/EG electrode. (f) Rate performance of the MnO<sub>2</sub>/EG electrode. The MnO<sub>2</sub>/EG electrode ( $\sim 12 \text{ mg cm}^{-2}$ ) exhibits a good real capacitance of  $4.90 \text{ F cm}^{-2}$  at the current density of  $1 \text{ mA cm}^{-2}$ .



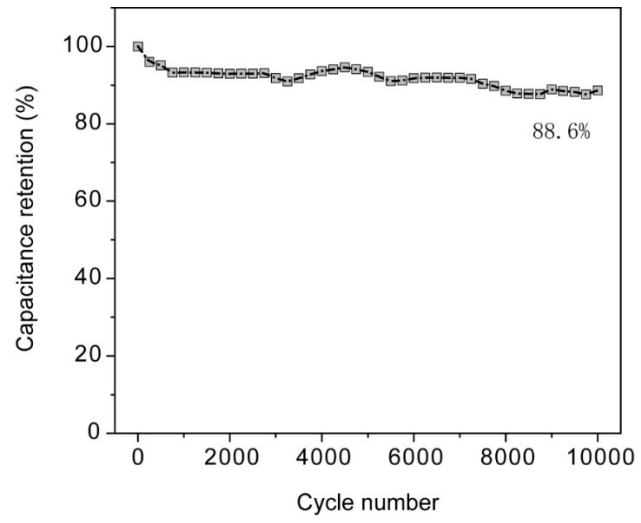

**Figure S18** Cycling stability of the device.
